# Supplementary material for: Comprehensive Analysis of ATF3 as a Diagnostic and Prognostic Biomarker from Pan-Cancer to Clear Cell Renal Cell Carcinoma
Source: Research Square preprint supplement (doi:10.21203/rs.3.rs-8644379/v1), 2026-02-02
Supplement: Supplementary file 2 [file 278d3ce1770c82918c877418.docx]

**
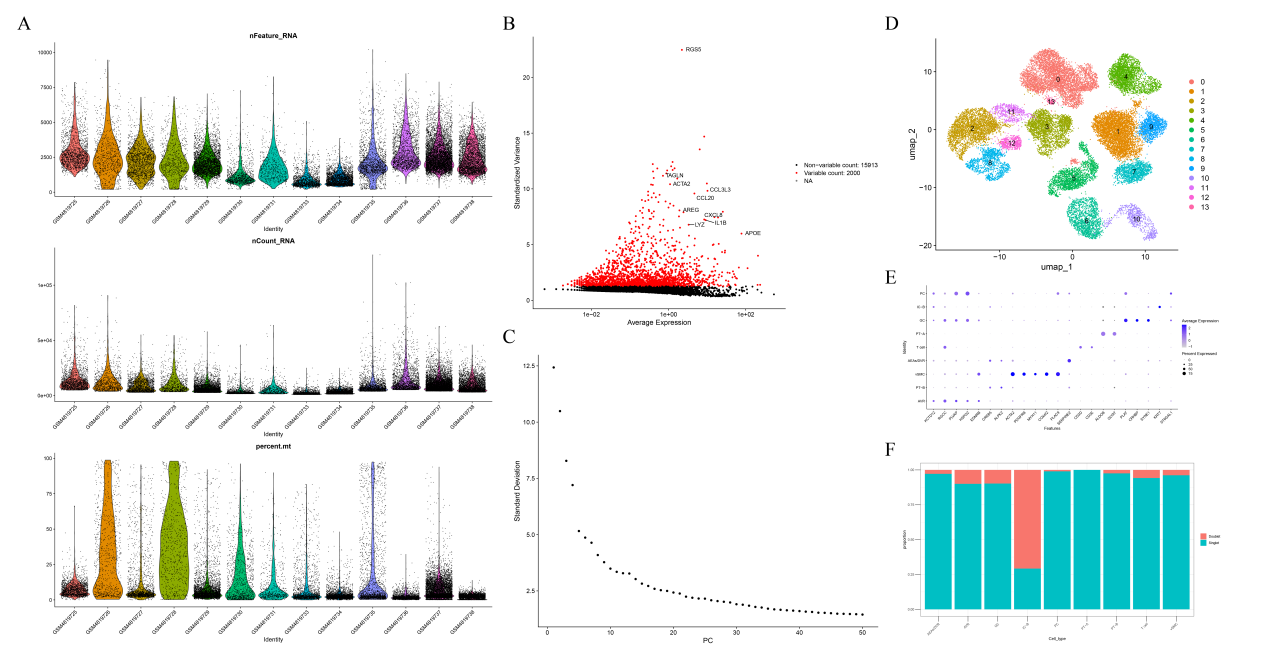
**

**Figure S1 Filtering of single-cell RNA-seq (scRNA-seq) data. (A)** Quality control metrics. **(B)** Top 2000 highly variable genes were selected. **(C)** Principal component analysis; the first 30 principal components were used. **(D)** Uniform Manifold Approximation and Projection (UMAP) visualization of single-cell clusters. **(E)** Cell-type annotation with marker genes. **(F)** Percentage of cell doublets.
