# Supplementary material for: Comprehensive Analysis of ATF3 as a Diagnostic and Prognostic Biomarker from Pan-Cancer to Clear Cell Renal Cell Carcinoma
Source: Research Square preprint supplement (doi:10.21203/rs.3.rs-8644379/v1), 2026-02-02
Supplement: Supplementary file 3 [file 70a4d415c9b437c7c1f15e9a.docx]

Raw western-blot image


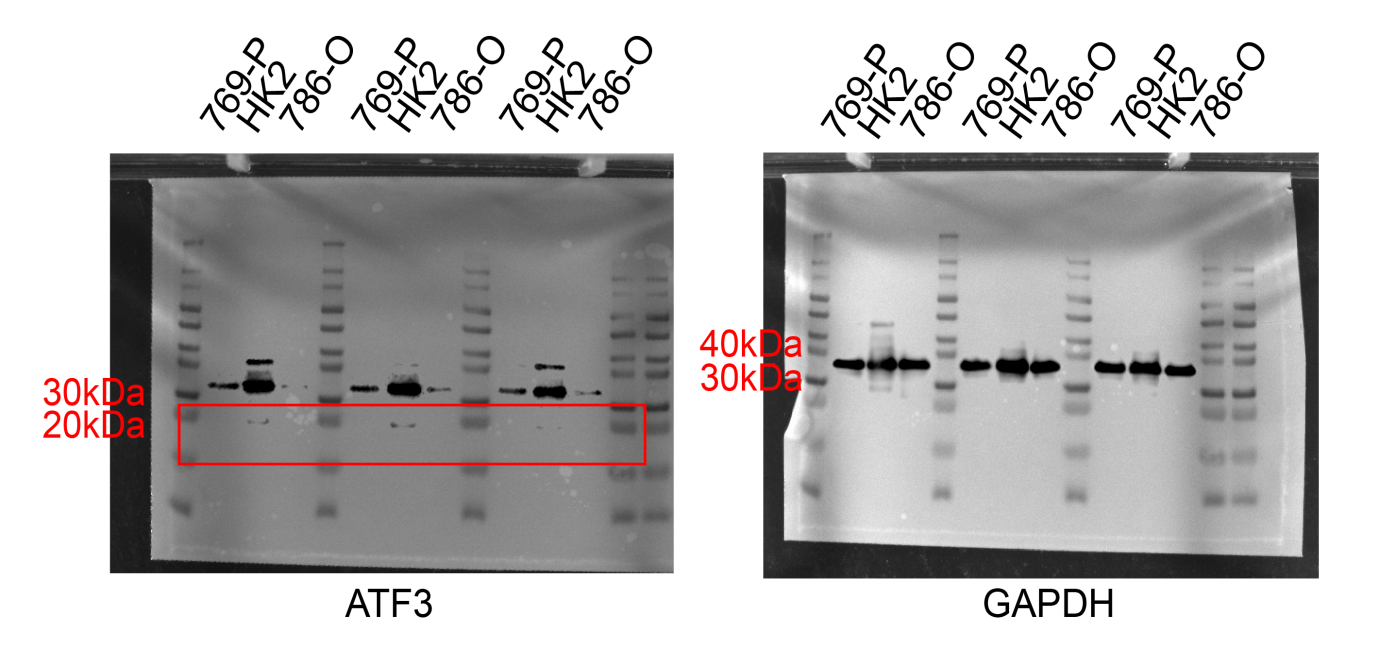


**Figure. Original images for Western blotting for ATF3 (23kDa) and GAPDH (36kDa) in figure 5.**
