# Supplementary material for: Comprehensive Analysis of ATF3 as a Diagnostic and Prognostic Biomarker from Pan-Cancer to Clear Cell Renal Cell Carcinoma
Source: Research Square preprint supplement (doi:10.21203/rs.3.rs-8644379/v1), 2026-02-02
Supplement: Supplementary file 4 [file d17cef26c6149a785ebc2371.docx]

Table S1 The list of primers used for this study

| Primer name | Sequence 5'-3' |
| --- | --- |
| GAPDH | F:5'-CTGGGCTACACTGAGCACC-3' |
| R:5'-AAGTGGTCGTTGAGGGCAATG-3' |
| ATF3 | F:5'-CCTCTGCGCTGGAATCAGTC-3' |
| R:5'-TTCTTTCTCGTCGCCTCTTTTT-3' |
